# Supplementary material for: A whirl of radiomics-based biomarkers in cancer immunotherapy, why is large scale validation still lacking?
Source: PubMed Central journal article supplement (PMC10881558; doi:10.1038/s41698-024-00534-9), 2024-02-21

## **Supplementary Notes**

### **Detailed results of the systematic review**

The used search query resulted in a total of 91 articles. The selection process is shown in Figure 2. Nine studies were excluded as they were non-primary research, not available in English or duplicates. After reviewing the full text, 26 studies were excluded. Studies were excluded as they involved non-human subjects, predicted an end-point that was not included in the criteria, combined different therapies or did not focus on radiomics. In total, 56 studies are included in the review.

**Supplementary Table 1.** Description of all the published papers of CT-based radiomics signatures for predicting response to immunotherapy or surrogate biomarkers using either machine learning (ML) or deep learning (DL) methods.

*Abbreviations: NSCLC (Non-small Cell Lung Cancer), OS (Overall Survival), PFS (Progression Free Survival).*

| Study                                           | Primary cancer           | Total cohort | End point(s)           |
|-------------------------------------------------|--------------------------|--------------|------------------------|
| <b>Machine Learning for Response Prediction</b> |                          |              |                        |
| Trebeschi S et al. 2019 Jun                     | Melanoma<br>NSCLC        | 203          | Disease control        |
| Ligero M et al. 2021 Apr                        | Solid Tumors             | 198          | Disease control        |
| Liu Y et al. 2021 Mar                           | NSCLC                    | 197          | Disease control        |
| Wu M et al. 2022 Jan                            | NSCLC                    | 131          | Disease control        |
| Ji Z et al. 2020 Oct                            | Gastric                  | 87           | Disease control        |
| Colen R et al. 2021 Apr                         | Rare cancers             | 57           | Disease control        |
| Wang Z et al. 2020 Aug                          | Melanoma                 | 50           | Disease control        |
| Malone E et al. 2022 Feb                        | Renall Cell Carcinoma    | 27           | Disease control        |
| Khorrani M et al. 2020 Jan                      | NSCLC                    | 139          | Disease control, OS    |
| Yang Y et al. 2021 Feb                          | NSCLC                    | 308          | Disease control, PFS   |
| Yang B et al. 2021 Jun                          | NSCLC                    | 92           | Disease control, PFS   |
| Gong J et al. 2022 Jan                          | NSCLC                    | 224          | Objective response     |
| Liang Z et al. 2022 Jan                         | Gastric                  | 87           | Objective response     |
| Park K et al. 2020 Oct                          | Urothelial carcinoma     | 62           | Objective response     |
| Yuan G et al. 2021 Jan                          | Hepatocellular carcinoma | 58           | Objective response     |
| Peisen F et al. 2022 Jun                        | Melanoma                 | 262          | Objective response, OS |
| Tunali I et al. 2021 May                        | NSCLC                    | 332          | OS                     |
| Schraag A et al. 2019 Dec                       | Melanoma                 | 103          | OS                     |
| Corino V et al. 2021 May                        | Head and Neck            | 85           | OS                     |
| Zerunian M et al. 2021 Mar                      | NSCLC                    | 21           | OS                     |
| Dercle L et al. 2022 Mar                        | Melanoma                 | 575          | OS                     |
| Ungan G et al. 2022 Oct                         | Melanoma                 | 71           | OS, Disease control    |
| Guerrisi A et al. 2021 Oct                      | Melanoma                 | 32           | OS, PFS                |
| Dercle L et al. 2020 May                        | NSCLC                    | 92           | PFS                    |
| Ladwa R et al. 2020 Jul                         | NSCLC                    | 47           | PFS                    |
| Liu C et al. 2021 Feb                           | NSCLC                    | 46           | PFS                    |
| Jazieh K et al. 2022 Mar                        | NSCLC                    | 133          | PFS, OS                |
| Nardone V et al. 2020 Feb                       | NSCLC                    | 59           | PFS, OS                |
| Tunali I et al. 2019 Mar                        | NSCLC                    | 228          | TTP                    |

| <b>Deep Learning for Response Prediction</b>     |                         |      |                      |
|--------------------------------------------------|-------------------------|------|----------------------|
| Ren Q et al. 2022 Aug                            | NSCLC                   | 157  | Disease control      |
| Rundo F et al. 2021 Oct                          | Urothelial carcinoma    | 42   | Disease control      |
| Trebeschi S et al. 2021 Mar                      | NSCLC                   | 152  | OS                   |
| He B et al. 2022 Apr                             | NSCLC                   | 236  | OS, PFS              |
| Trebeschi S et al. 2021 Apr                      | Urothelial              | 74   | OS                   |
| <b>Machine Learning for Biomarker Prediction</b> |                         |      |                      |
| Sun R et al. 2018 Sep                            | Solid Tumors            | 491  | CD8                  |
| Varghese B et al. 2022 Sep                       | Renall Cell Carcinoma   | 78   | CD8-T, PD-L1         |
| Huang W et al. 2022 Aug                          | Gastric                 | 2272 | NLR                  |
| Mazzaschi G et al. 2020 Jun                      | NSCLC                   | 100  | OS                   |
| Trentini F et al. 2022 Feb                       | NSCLC                   | 100  | PD-1/CD8 ratio       |
| Tang C et al. 2018 Jan                           | NSCLC                   | 290  | PD-L1                |
| Zheng Y et al. 2022 Jan                          | Head and Neck carcinoma | 179  | PD-L1                |
| Zheng Y et al. 2022 Aug                          | Head and Neck carcinoma | 157  | PD-L1                |
| Yoon J et al. 2020 Apr                           | Lung                    | 153  | PD-L1                |
| Iwatate Y et al. 2020 Oct                        | Pancreatic              | 107  | PD-L1                |
| Bracci S et al. 2021 Nov                         | NSCLC                   | 72   | PD-L1                |
| Shiinoki T et al. 2022 Feb                       | NSCLC                   | 161  | PD-L1                |
| Jiang Z et al. 2021 Oct                          | NSCLC                   | 125  | PD-L1                |
| Wen Q et al. 2021 Aug                            | NSCLC                   | 120  | PD-L1                |
| Wen Q et al. 2020 Nov                            | Esophageal Squamous     | 220  | PD-L1, CD8           |
| Tang X et al. 2021 Jul                           | Bladder                 | 75   | TMB                  |
| <b>Deep Learning for Biomarker Prediction</b>    |                         |      |                      |
| Wang C et al. 2021 Dec                           | NSCLC                   | 1262 | EGFR Mutation, PD-L1 |
| Wang C et al. 2022 Feb                           | NSCLC                   | 873  | EGFR Mutation, PD-L1 |
| Wang C et al. 2022 Apr                           | NSCLC                   | 1946 | PD-L1                |
| Tian P et al. 2021 Jan                           | NSCLC                   | 939  | PD-L1                |
| Zhu Y et al. 2020 Aug                            | Lung                    | 127  | PD-L1                |
| He B et al. 2020 Jul                             | NSCLC                   | 327  | TMB                  |

**Supplementary Table 2.** CLEAR guidelines applied to the seven articles included in the meta-analysis.

| Title                                                           | Wang Feb 2022 | Wang Apr 2022 | Zhu Aug 2020 | Zheng Feb 2022 | Wang Feb 2022 | Bracci Nov 2021 | Jiang Oct 2021 |
|-----------------------------------------------------------------|---------------|---------------|--------------|----------------|---------------|-----------------|----------------|
| 1 Relevant title, specifying the radiomic methodology           | NO            | YES           | NO           | YES            | NO            | YES             | YES            |
| <b>Abstract</b>                                                 |               |               |              |                |               |                 |                |
| 2 Structured summary with relevant information                  | Yes           | YES           | YES          | YES            | Yes           | YES             | YES            |
| <b>Keywords</b>                                                 |               |               |              |                |               |                 |                |
| 3 Relevant keywords for radiomics                               | NO            | YES           | YES          | YES            | NO            | YES             | YES            |
| <b>Introduction</b>                                             |               |               |              |                |               |                 |                |
| 4 Scientific or clinical background                             | YES           | YES           | YES          | YES            | YES           | YES             | YES            |
| 5 Rationale for using a radiomic approach                       | YES           | YES           | YES          | YES            | YES           | YES             | YES            |
| 6 Study objective(s)                                            | YES           | YES           | YES          | YES            | YES           | YES             | YES            |
| <b>Method</b>                                                   |               |               |              |                |               |                 |                |
| 7 Adherence to guidelines or checklists (e.g., CLEAR checklist) | NO            | NO            | YES          | NO             | NO            | NO              | NO             |
| 8 Ethical details (e.g., approval, consent, data protection)    | YES           | YES           | YES          | NO             | YES           | YES             | YES            |
| 9 Sample size calculation                                       | NO            | NO            | NO           | NO             | NO            | NO              | NO             |
| 10 Study nature (e.g., retrospective, prospective)              | YES           | YES           | NO           | NO             | YES           | YES             | YES            |
| 11 Eligibility criteria                                         | YES           | YES           | NO           | YES            | YES           | YES             | YES            |
| 12 Flowchart for technical pipeline                             | YES           | YES           | NO           | NO             | YES           | NO              | NO             |
| 13 Data source (e.g., private, public)                          | YES           | YES           | YES          | YES            | YES           | YES             | YES            |
| 14 Data overlap                                                 | NA            | NA            | NA           | NA             | NA            | NA              | NA             |
| 15 Data split methodology                                       | YES           | YES           | YES          | NO             | YES           | YES             | YES            |

|                                                                   |     |     |     |     |     |     |     |
|-------------------------------------------------------------------|-----|-----|-----|-----|-----|-----|-----|
| 16 Imaging protocol (i.e., image acquisition and processing)      | YES | NO  | YES | YES | YES | YES | YES |
| 17 Definition of non-radiomic predictor variables                 | YES | YES | YES | NO  | YES | NO  | NA  |
| 18 Definition of the reference standard (i.e., outcome variable)  | YES | YES | YES | YES | YES | YES | YES |
| 19 Segmentation strategy                                          | YES | NO  | YES | YES | YES | YES | YES |
| 20 Details of operators performing segmentation                   | NO  | NO  | YES | YES | NO  | YES | YES |
| 21 Image pre-processing details                                   | YES | YES | YES | YES | YES | NO  | YES |
| 22 Resampling method and its parameters                           | YES | YES | NO  | YES | YES | NO  | YES |
| 23 Discretization method and its parameters                       | YES | YES | YES | YES | YES | NO  | YES |
| 24 Image types (e.g., original, filtered, transformed)            | YES | NO  | NO  | NO  | YES | NO  | NO  |
| 25 Feature extraction method                                      | NO  | YES | NA  | YES | NO  | YES | YES |
| 26 Feature classes                                                | YES | YES | NA  | YES | YES | YES | YES |
| 27 Number of features                                             | YES | YES | NA  | YES | YES | YES | YES |
| 28 Default configuration statement for remaining parameters       | NO  | YES | NA  | YES | NO  | NO  | NO  |
| 29 Handling of missing data                                       | NA  | NA  | NA  | NA  | NA  | NA  | NA  |
| 30 Details of class imbalance                                     | NO  | YES | NO  | NA  | NO  | YES | YES |
| 31 Details of segmentation reliability analysis                   | NO  | NO  | NO  | YES | NO  | YES | YES |
| 32 Feature scaling details (e.g., normalization, standardization) | NO  | NO  | NO  | YES | NO  | NO  | NO  |
| 33 Dimension reduction details                                    | YES | YES | NA  | YES | YES | YES | YES |
| 34 Algorithm details                                              | YES | YES | YES | YES | YES | YES | YES |
| 35 Training and tuning details                                    | NO  | YES | YES | YES | NO  | YES | YES |
| 36 Handling of confounders                                        | NO  | NO  | NO  | NO  | NO  | NO  | NO  |
| 37 Model selection strategy                                       | NO  | YES | NO  | YES | NO  | NO  | YES |

|                                                                       |     |     |     |     |     |     |     |
|-----------------------------------------------------------------------|-----|-----|-----|-----|-----|-----|-----|
| 38 Testing technique (e.g., internal, external)                       | YES | YES | YES | YES | YES | YES | YES |
| 39 Performance metrics and rationale for choosing                     | YES | YES | YES | YES | YES | YES | YES |
| 40 Uncertainty evaluation and measures (e.g., confidence intervals)   | YES | YES | NO  | YES | YES | YES | NO  |
| 41 Statistical performance comparison (e.g., DeLong's test)           | YES | YES | YES | YES | YES | YES | YES |
| 42 Comparison with non-radiomic and combined methods                  | YES | YES | NO  | NO  | YES | NO  | YES |
| 43 Interpretability and explainability methods                        | YES | YES | no  | NO  | YES | NO  | NO  |
| <b>Results</b>                                                        |     |     |     |     |     |     |     |
| 44 Baseline demographic and clinical characteristics                  | YES | YES | YES | YES | YES | YES | YES |
| 45 Flowchart for eligibility criteria                                 | YES | YES | NO  | YES | YES | NO  | YES |
| 46 Feature statistics (e.g., reproducibility, feature selection)      | NO  | NO  | NA  | YES | NO  | NO  | NO  |
| 47 Model performance evaluation                                       | YES | YES | YES | YES | YES | YES | YES |
| 48 Comparison with non-radiomic and combined approaches               | YES | YES | NO  | NO  | YES | YES | YES |
| <b>Discussion</b>                                                     |     |     |     |     |     |     |     |
| 49 Overview of important findings                                     | YES | NO  | YES | YES | YES | YES | YES |
| 50 Previous works with differences from the current study             | NO  | YES | YES | YES | NO  | YES | NO  |
| 51 Practical implications                                             | YES | YES | YES | YES | YES | YES | YES |
| 52 Strengths and limitations (e.g., bias and generalizability issues) | YES | YES | YES | YES | YES | YES | YES |
| <b>Open Science</b>                                                   |     |     |     |     |     |     |     |
| 53 Sharing images along with segmentation data [n/e]                  | NO  | NO  | NO  | NO  | NO  | NO  | NO  |
| 54 Sharing radiomic feature data                                      | NO  | NO  | NO  | NO  | NO  | NO  | NO  |
| 55 Sharing pre-processing scripts or settings                         | NO  | NO  | NO  | NO  | NO  | NO  | NO  |
| 56 Sharing source code for modeling                                   | NO  | NO  | NO  | NO  | NO  | NO  | NO  |
| 57 Sharing final model files                                          | NO  | NO  | NO  | NO  | NO  | NO  | NO  |
| 58 Sharing a ready-to-use system [n/e]                                | NO  | NO  | NO  | NO  | NO  | NO  | NO  |

**Supplementary Figure 1.** Most common feature selection and modeling methods.

Graph showing the most frequently used feature selection methods and machine learning models (ML) in combination for predicting direct response or surrogate biomarkers of response. 'Other' includes the less frequent methods used.

*Abbreviations: LASSO (least absolute shrinkage and selection operator), mRMR (minimal-redundancy-maximal-relevance), SVM (support vector machine), LogReg (Logistic Regression).*

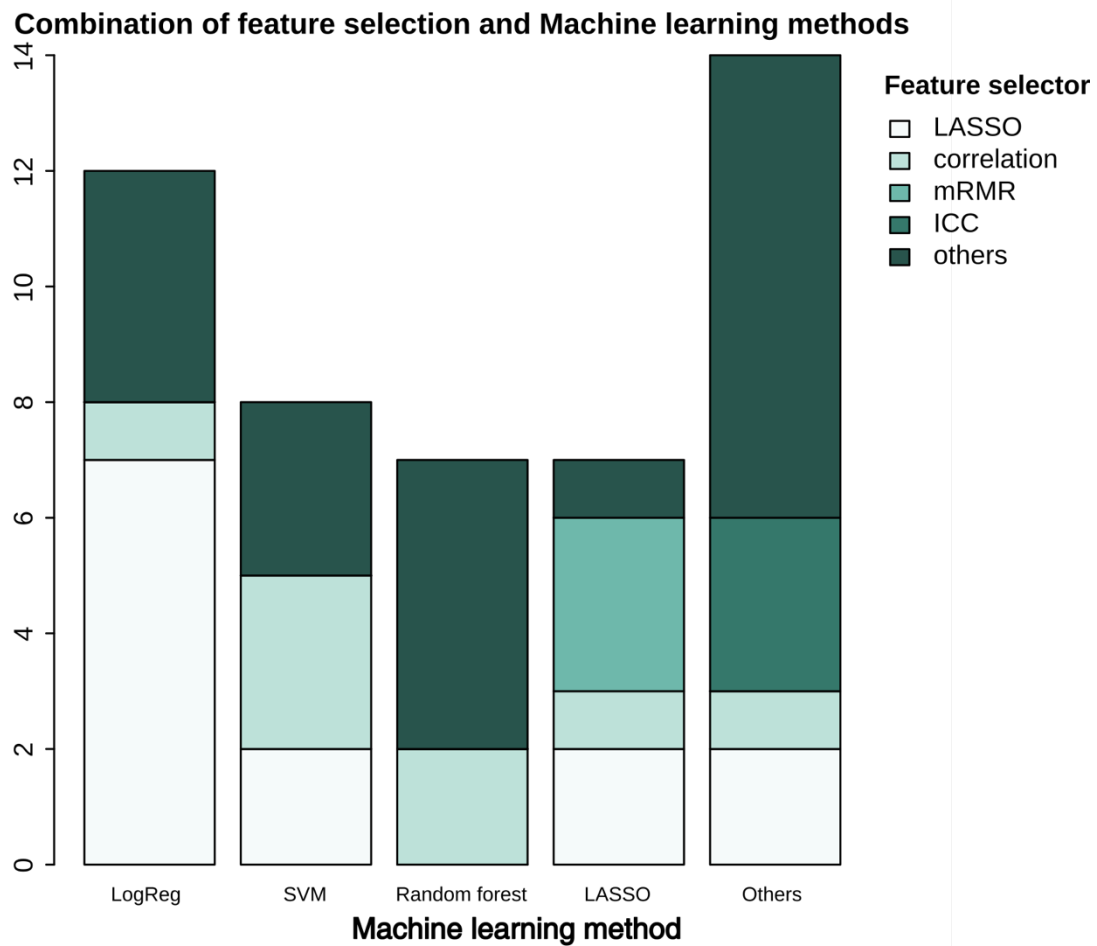

Supplement: 41698_2024_534_MOESM1_ESM.pdf [file 41698_2024_534_MOESM1_ESM.pdf]
